# Supplementary material for: QUADICA v2: Extending the large-sample data set for water QUAlity, DIscharge and Catchment Attributes in Germany
Source: Copernicus journal article supplement (doi:10.5194/essd-2025-450), 2025-10-21
Supplement: Supplementary file [file essd-2025-450-AC2-supplement.pdf]

**Reply to comments from Referee 2 of the preprint in ESSD “QUADICA v2:  
Extending the large-sample data set for water QUALity, Discharge and  
Catchment Attributes in Germany” by Ebeling et al.**

In this data paper, Ebeling et al. present an updated version of their QUADICA database, which provides data on water quality and its controlling factor across Germany. Compared to the original version, QUADICA v2 contains additional water quality parameters, monitoring stations and data on 'driving forces'.

It is a comprehensive and well-described database, and the updates are significant enough to justify a second data paper on QUADICA. The database will be invaluable to scientists working on water quality and its controlling factors.

[We thank the reviewer for the positive assessment of our work and value of the data set.](#)

The only drawback of QUADICA v2 is that it only includes aggregated annual or monthly data, not raw data. This is a pity, as it will prevent its use for some potential statistical analyses. However, the authors explain that they had no choice because data providers have strict policies regarding data sharing.

[We agree with the reviewer that this is a drawback and acknowledge the reviewers understanding given the data policies.](#)
